# Supplementary material for: Light Stability, Pro-Apoptotic and Genotoxic Properties of Silver (I) Complexes of Metronidazole and 4-Hydroxymethylpyridine against Pancreatic Cancer Cells In Vitro
Source: PubMed Central journal article supplement (PMC7767315; doi:10.3390/cancers12123848), 2020-12-20
Supplement: cancers-12-03848-s001.pdf [file cancers-12-03848-s001.pdf]

Supplementary Materials

# Light Stability, Pro-Apoptotic and Genotoxic Properties of Silver(I) Complexes with Metronidazole and 4-hydroxymethylpyridine against Pancreatic Cancer Cells In Vitro

Dominik Żyro, Agnieszka Śliwińska, Izabela Szymczak-Pajor, Małgorzata Stręk and Justyn Ochocki

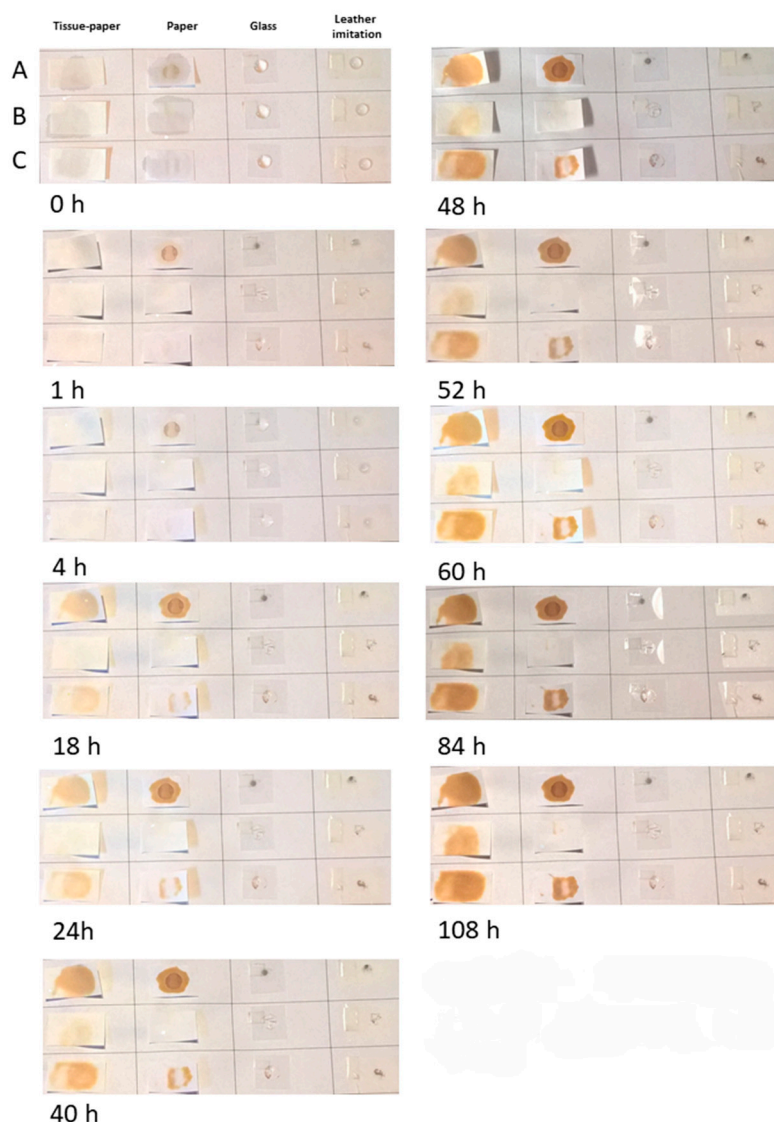

**Figure S1.** Groundworks with applied solutions of: silver nitrate (A) and complexes of silver: with metronidazole (B) and 4-hydroxymethylpyridine (C) left in the dark and photographed after the time shown.

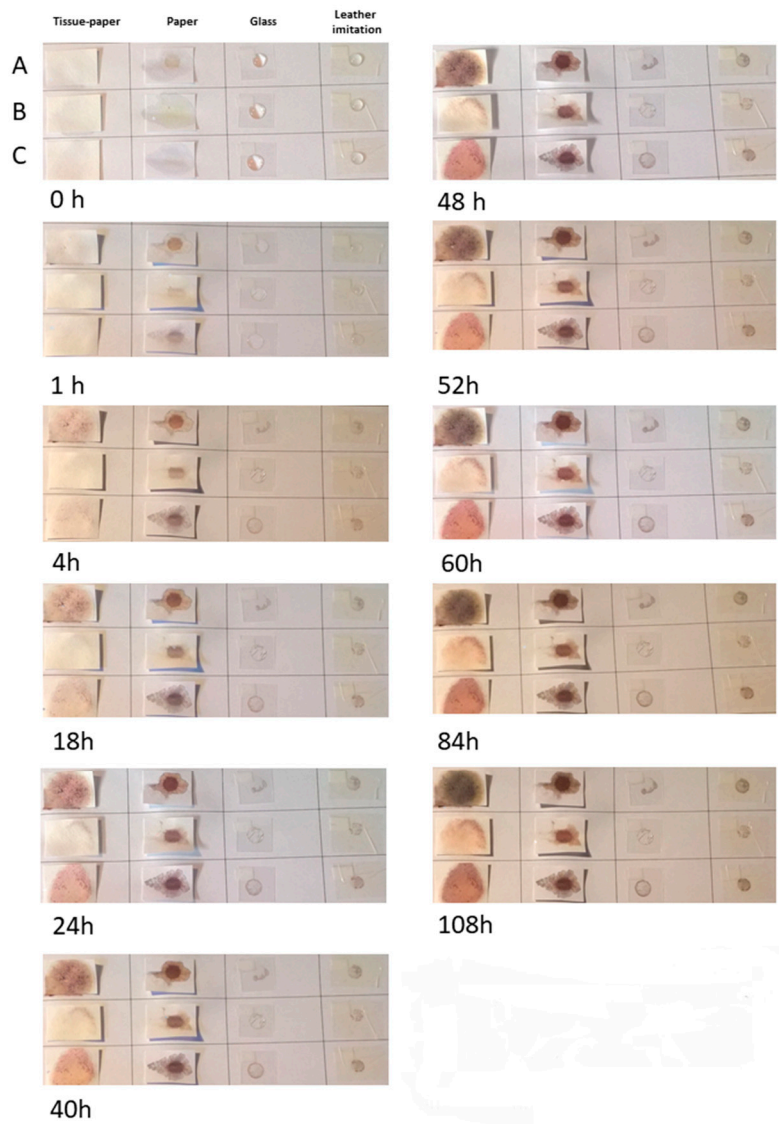

**Figure S2.** Groundworks with applied solutions of: silver nitrate (A) and complexes of silver: with metronidazole (B) and 4-hydroxymethylpyridine (C) left in the light and photographed after the time shown.

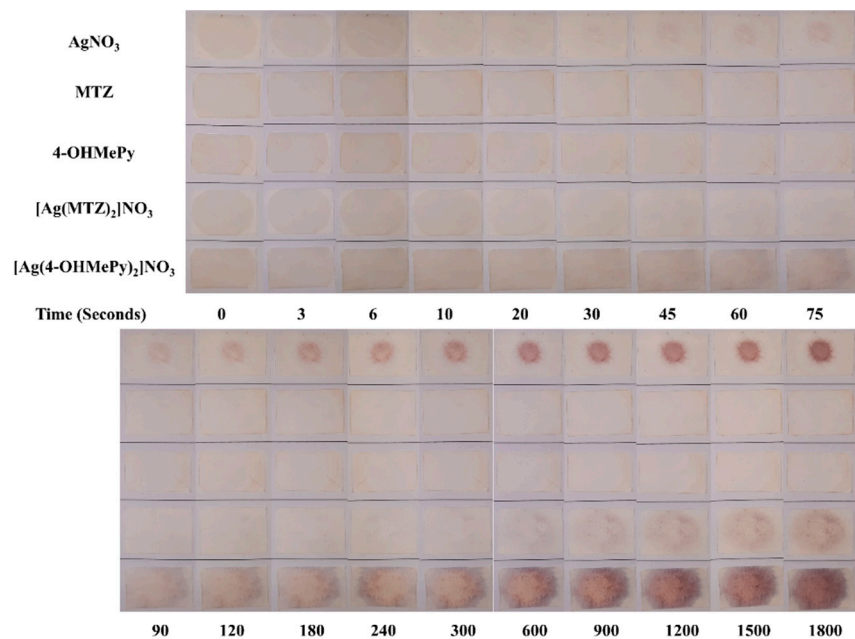

**Figure S3.** Tissue-paper with applied solutions of: silver nitrate, metronidazole, 4-hydroxypyridine and complexes of silver: with metronidazole and 4-hydroxymethylpyridine left in UV-A and photographed after the time shown.

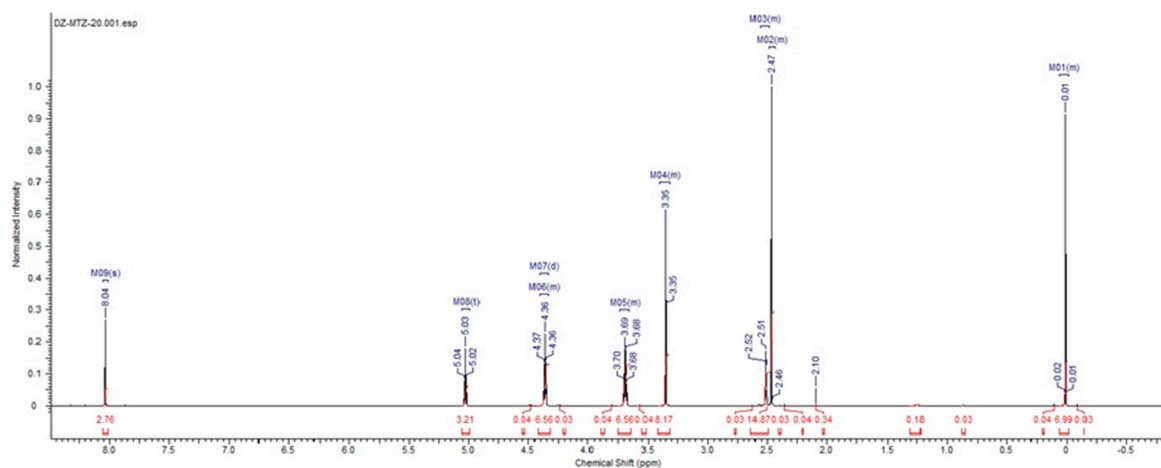

(A)

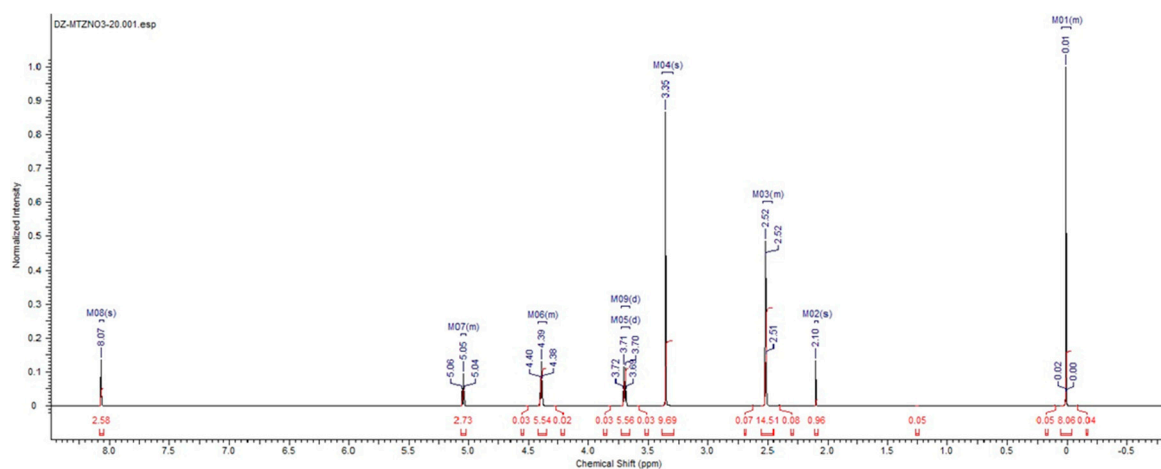

(B)

**Figure S4.**  $^1\text{H}$  NMR (600MHz, DMSO) spectra of metronidazole (A) and silver(I) complex with metronidazole (B).

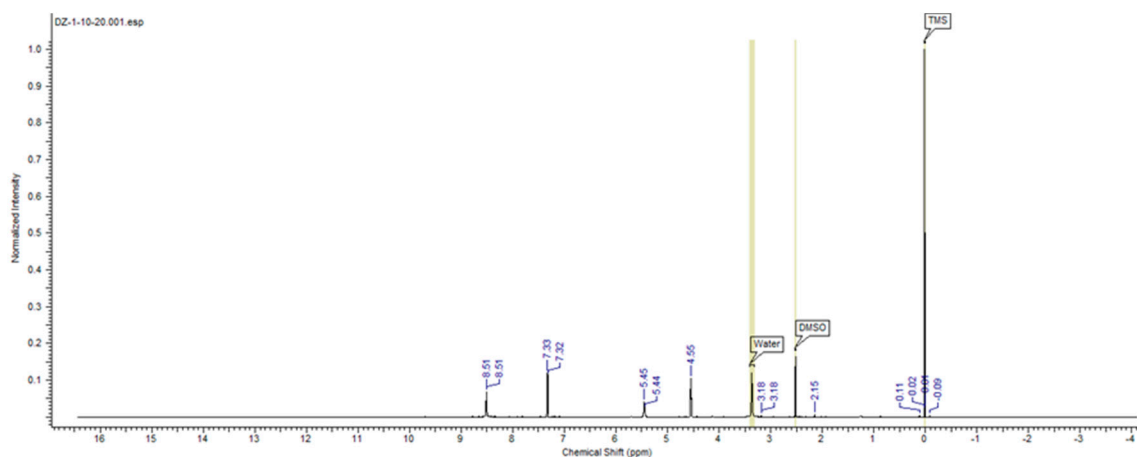

(A)

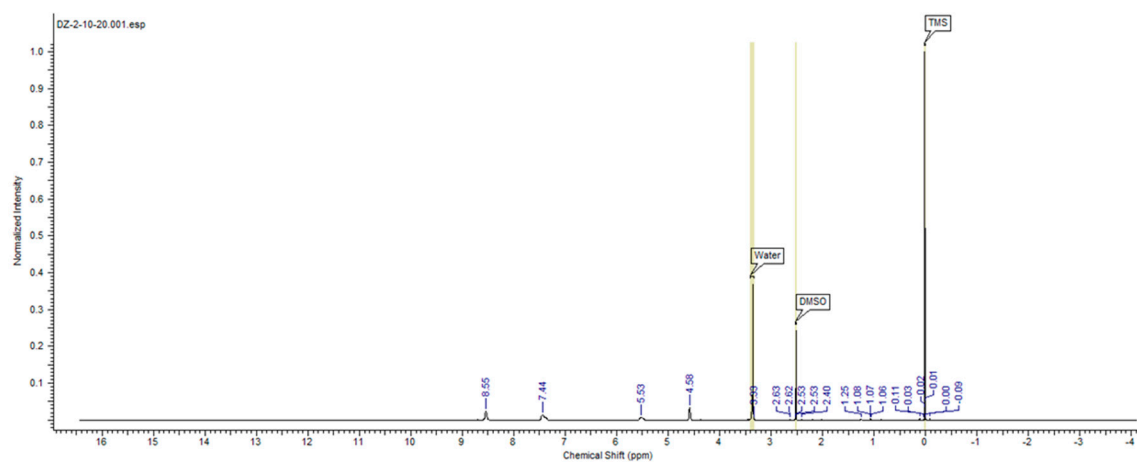

(B)

**Figure S5.**  $^1\text{H}$  NMR (600MHz, DMSO) spectra of 4-hydroxymethylpyridine (A) and silver(I) complex with 4-hydroxymethylpyridine (B).

**Publisher's Note:** MDPI stays neutral with regard to jurisdictional claims in published maps and institutional affiliations.

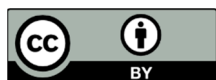

© 2020 by the authors. Licensee MDPI, Basel, Switzerland. This article is an open access article distributed under the terms and conditions of the Creative Commons Attribution (CC BY) license (<http://creativecommons.org/licenses/by/4.0/>).
